# Supplementary material for: Spin crossover complexes [Fe(NH2trz)3](X)2·nH2O investigated by means of polarized Raman scattering and DFT calculations
Source: Royal Society of Chemistry journal article supplement (doi:10.1039/c3cp52505h), 2013-01-01
Supplement: c3cp52505h.pdf [file c3cp52505h.pdf]

## Supplementary information of

# Spin crossover complexes $[\text{Fe}(\text{NH}_2\text{trz})_3](\text{X})_2 \cdot n\text{H}_2\text{O}$ investigated by means of Raman scattering and DFT calculations.

Yeny A. Tobon<sup>1,3</sup>, Lara Kabalan<sup>2</sup>, Sébastien Bonhommeau<sup>1</sup>, Nathalie Daro<sup>2</sup>, Arnaud Grosjean<sup>2</sup>, Philippe Guionneau<sup>2</sup>, Samir Matar<sup>2</sup>, Jean-François Létard<sup>2</sup>, François Guillaume<sup>1</sup>

<sup>1</sup>*Université Bordeaux 1, CNRS UMR 5255, ISM, 33405 Talence Cedex, France*

<sup>2</sup>*CNRS UPR 9048, Université Bordeaux 1, ICMCB, 33600 Pessac, France*

<sup>3</sup>*Université de Lille 1, CNRS UMR 8516, LASIR, Bât. C5, 59655 Villeneuve d'Ascq Cedex,  
France*

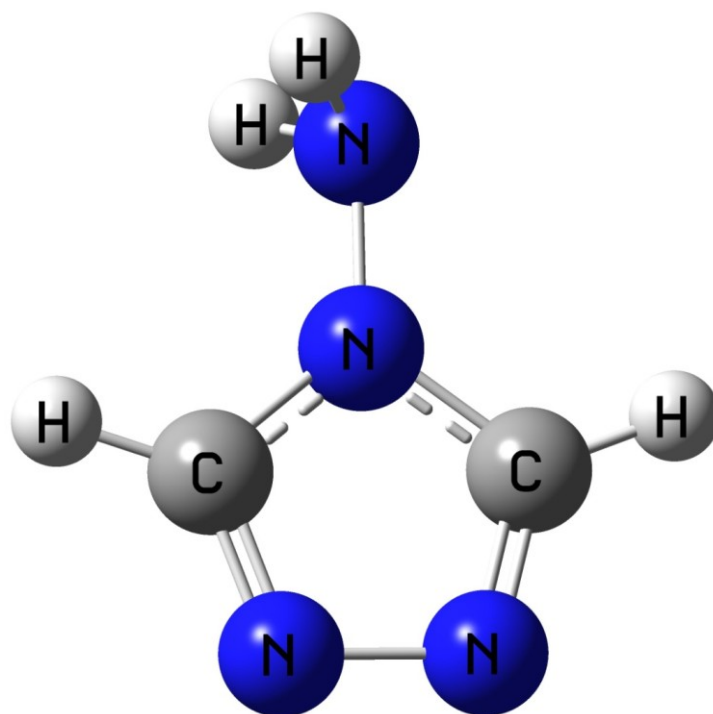

**Figure S1.** B3LYP/6-31+G\* molecular model for 4-NH<sub>2</sub>-1,2,4-triazole (NH<sub>2</sub>trz).

**Table S1.** Wavenumbers (cm<sup>-1</sup>) and assignments of the Raman bands of the NH<sub>2</sub>trz molecule calculated with the B3LYP/6-31+G\* method. The potential energy distribution (PED) was calculated using the freeware GAR2PED (Martin, J.M.L, Van Alsenoy, C., GAR2PED, *A Program to obtain a Potential Energy Distribution from a Gaussian archive record*, University of Antwerp, Belgium (2007)).

| Mode | B3LYP/6-31+G* | Assignment (PED) <sup>a</sup>       |
|------|---------------|-------------------------------------|
| 1.   | 205.96        | γNH <sub>2</sub> (93%)              |
| 2.   | 270.46        | τCN-NH <sub>2</sub> (87%)           |
| 3.   | 387.22        | δC-N-NH <sub>2</sub> (84%)          |
| 4.   | 614.33        | γrg (86%)                           |
| 5.   | 685.01        | νN-NH <sub>2</sub> (45%), δrg (30%) |
| 6.   | 691.57        | τrg (95%)                           |
| 7.   | 801.36        | γCH (82%)                           |
| 8.   | 840.19        | γCH (75%)                           |
| 9.   | 882.46        | ωNH <sub>2</sub> (77%)              |
| 10.  | 937.59        | δrg (82%)                           |
| 11.  | 1005.29       | νN-N (89%)                          |

|     |         |                                                                                            |
|-----|---------|--------------------------------------------------------------------------------------------|
| 12. | 1073.05 | $\delta$ rg (39%), $\nu$ C-NNH <sub>2</sub> (37%), $\delta$ H-C-N (16%)                    |
| 13. | 1213.04 | $\delta$ H-C-N (33%), $\delta$ rg (25%),<br>$\nu$ N-NH <sub>2</sub> (16%), $\nu$ N-N (11%) |
| 14. | 1217.74 | $\delta$ H-C-N (84%)                                                                       |
| 15. | 1319.73 | $\rho$ NH <sub>2</sub> (98%)                                                               |
| 16. | 1335.25 | $\nu$ C-NNH <sub>2</sub> (43%), $\nu$ C-N (26%)                                            |
| 17. | 1410.22 | $\nu$ C-N (50%), $\nu$ C-NNH <sub>2</sub> (43%)                                            |
| 18. | 1502.69 | $\nu$ C-N (78%)                                                                            |
| 19. | 1542.07 | $\nu$ C-N (31%), $\delta$ H-C-N (27%), $\nu$ C-NNH <sub>2</sub> (24%)                      |
| 20. | 1687.90 | $\delta$ NH <sub>2</sub> (90%)                                                             |
| 21. | 3271.47 | $\nu$ C-H (98%)                                                                            |
| 22. | 3290.73 | $\nu$ C-H (98%)                                                                            |
| 23. | 3495.87 | $\nu$ N-H (100%)                                                                           |
| 24. | 3596.21 | $\nu$ N-H (100%)                                                                           |

<sup>a</sup> Meaning of symbols:  $\nu$ , stretching;  $\delta$ , deformation or in-plane bending;  $\gamma$ , out-of-plane bending;  $\omega$ , wagging;  $\tau$ , torsion;  $\rho$ , rocking; rg, ring

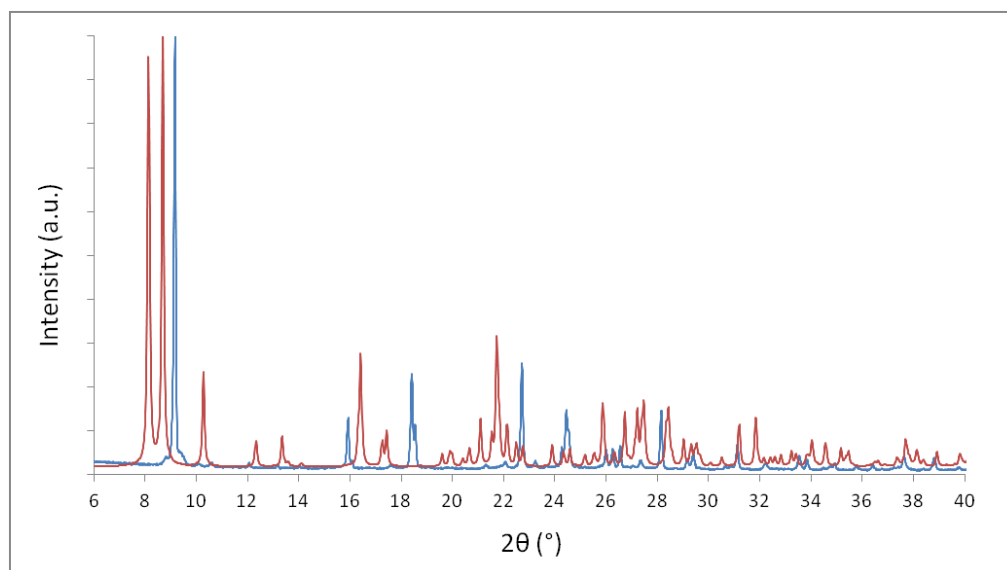

**Figure S2:** comparison of the powder X-ray diffraction patterns of [Fe(NH<sub>2</sub>-trz)<sub>3</sub>](NO<sub>3</sub>)<sub>2</sub>·2H<sub>2</sub>O (red line, derived from the single-crystal pattern) and [Fe(NH<sub>2</sub>-trz)<sub>3</sub>](NO<sub>3</sub>)<sub>2</sub>·H<sub>2</sub>O (blue line, experimental pattern).

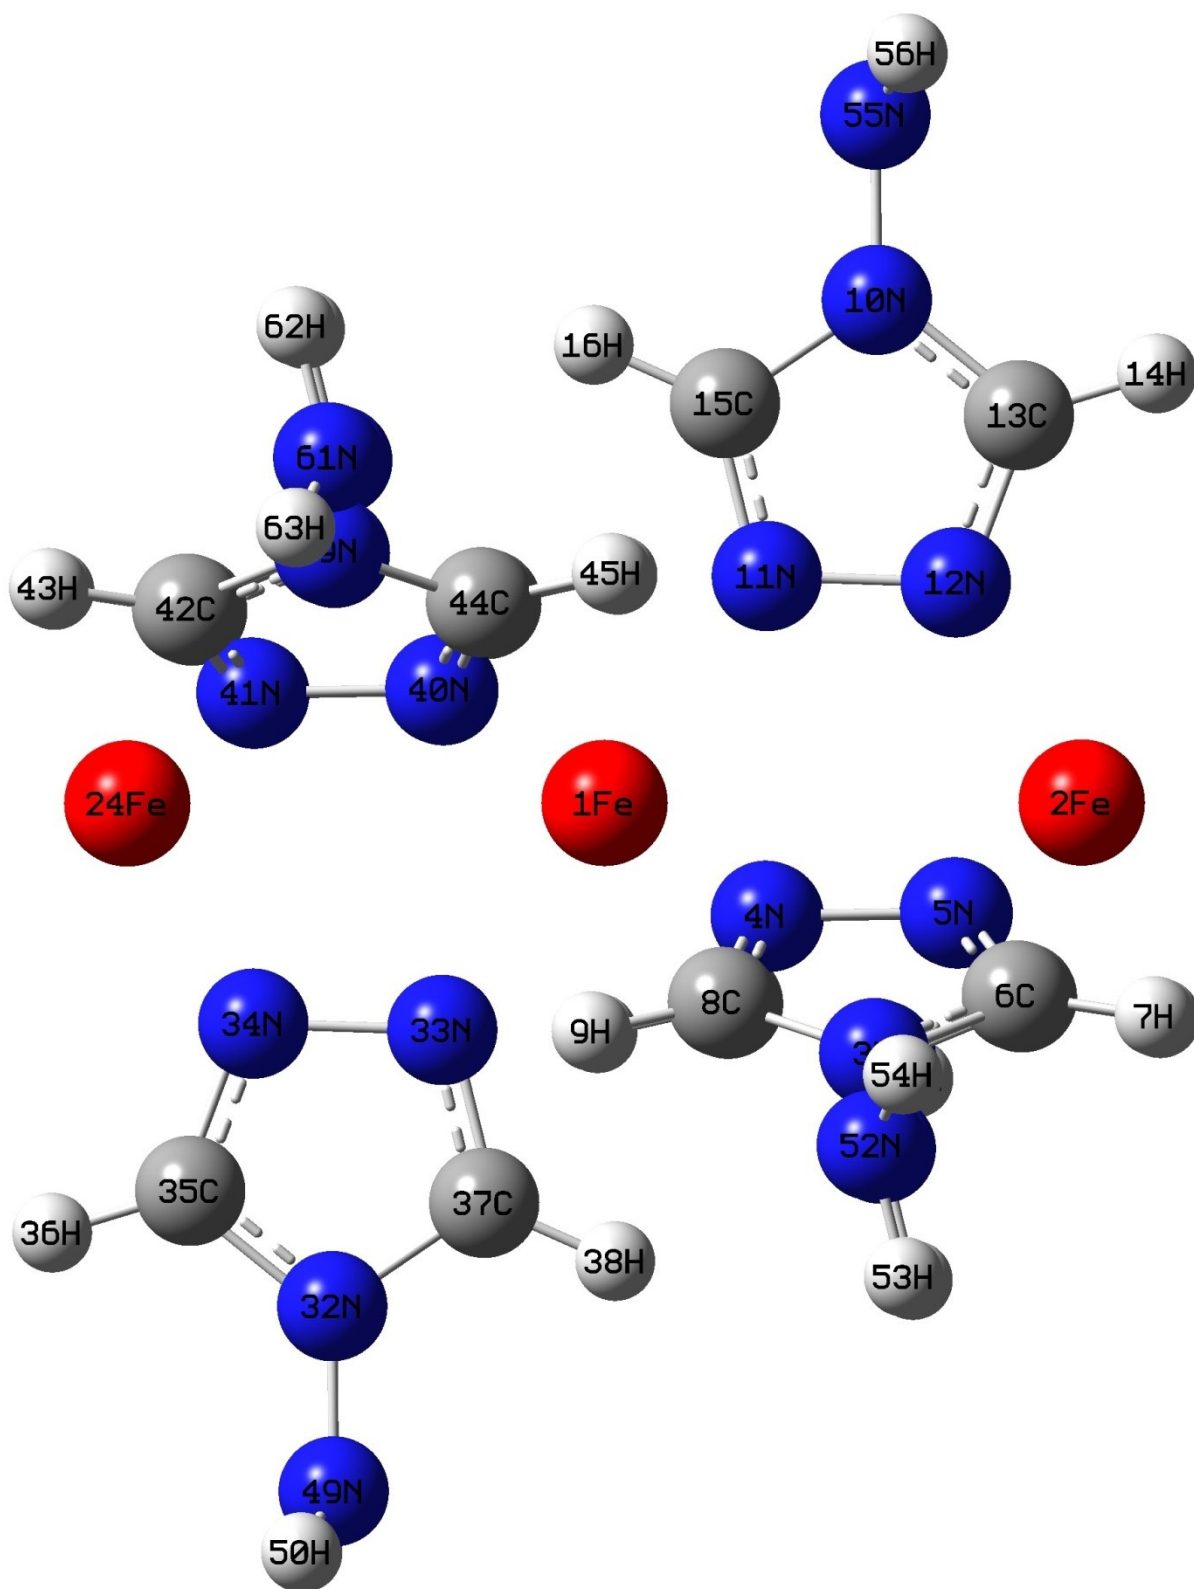

**Figure S3.** B3LYP/LANL2DZ/6-31+G\* molecular model for the polymeric ionic  $\text{Fe}(\text{NH}_2\text{-trz})_3^{2+}$  complex, in the LS state, containing three Fe atoms and six  $\text{NH}_2\text{-trz}$  ligands

**Table S2.** Cartesian coordinates of the optimized structure for the polymeric ionic  $\text{Fe}(\text{NH}_2\text{-trz})_3^{2+}$  complex, in the LS state, containing three Fe atoms and six  $\text{NH}_2\text{-trz}$  ligands at the B3LYP/LanL2DZ/6-31+G\* level of approximation

| Atom | X         | Y         | Z         |
|------|-----------|-----------|-----------|
| Fe   | 0.000001  | -0.000012 | 0.000054  |
| Fe   | -3.588869 | 0.00207   | -0.000366 |
| N    | -2.051725 | -1.809853 | -3.323079 |
| N    | -1.222884 | -0.816021 | -1.498201 |
| N    | -2.643868 | -0.791524 | -1.456096 |
| C    | -3.118958 | -1.392938 | -2.56065  |
| H    | -4.1573   | -1.542152 | -2.836915 |
| C    | -0.908334 | -1.439227 | -2.640602 |
| H    | 0.07666   | -1.650542 | -3.025964 |
| N    | -2.0492   | 3.784452  | 0.093863  |
| N    | -1.221375 | 1.706764  | 0.042542  |
| N    | -2.642327 | 1.658747  | 0.041442  |
| C    | -3.116849 | 2.916266  | 0.072572  |
| H    | -4.155041 | 3.230683  | 0.080608  |
| C    | -0.906164 | 3.007561  | 0.074371  |
| H    | 0.079036  | 3.446431  | 0.084753  |
| N    | -2.052564 | -1.972863 | 3.22875   |
| N    | -1.223582 | -0.889406 | 1.455707  |
| N    | -2.644597 | -0.863568 | 1.414289  |
| C    | -3.119744 | -1.519286 | 2.487446  |
| H    | -4.158124 | -1.682505 | 2.755527  |
| C    | -0.909124 | -1.568185 | 2.565993  |
| H    | 0.075883  | -1.797678 | 2.940783  |
| Fe   | 3.588857  | -0.002192 | 0.000422  |
| N    | 2.05181   | 1.809937  | 3.323069  |
| N    | 1.222923  | 0.815993  | 1.498272  |
| N    | 2.643916  | 0.791395  | 1.45619   |
| C    | 3.119023  | 1.392921  | 2.560672  |
| H    | 4.157373  | 1.542119  | 2.836917  |

| <b>Atom</b> | <b>X</b>  | <b>Y</b>  | <b>Z</b>  |
|-------------|-----------|-----------|-----------|
| C           | 0.908406  | 1.439195  | 2.640684  |
| H           | -0.076583 | 1.650559  | 3.026033  |
| N           | 2.04907   | -3.784511 | -0.094143 |
| N           | 1.221331  | -1.706797 | -0.042421 |
| N           | 2.642312  | -1.658843 | -0.041328 |
| C           | 3.116759  | -2.916383 | -0.072609 |
| H           | 4.154935  | -3.230853 | -0.080558 |
| C           | 0.906071  | -3.007569 | -0.07456  |
| H           | -0.079146 | -3.446396 | -0.085132 |
| N           | 2.052591  | 1.972948  | -3.228605 |
| N           | 1.223599  | 0.889423  | -1.455604 |
| N           | 2.644645  | 0.863587  | -1.41418  |
| C           | 3.119772  | 1.519319  | -2.487334 |
| H           | 4.15815   | 1.68257   | -2.755405 |
| C           | 0.909154  | 1.568277  | -2.565845 |
| H           | -0.075851 | 1.797871  | -2.940584 |
| N           | 2.042345  | 2.477531  | 4.546935  |
| H           | 2.281233  | 1.926687  | 5.370366  |
| H           | 2.284059  | 3.467404  | 4.530065  |
| N           | 2.038874  | -5.178188 | -0.128673 |
| H           | 2.277881  | -5.615589 | -1.017551 |
| H           | 2.280064  | -5.659044 | 0.736864  |
| N           | -2.042236 | -2.477129 | -4.547112 |
| H           | -2.282883 | -3.467264 | -4.530362 |
| H           | -2.282141 | -1.926332 | -5.370279 |
| N           | -2.03905  | 5.178146  | 0.127775  |
| H           | -2.282163 | 5.658607  | -0.737447 |
| H           | -2.27618  | 5.615916  | 1.016976  |
| N           | -2.043099 | -2.700001 | 4.418207  |
| H           | -2.282891 | -2.19064  | 5.267674  |
| H           | -2.284043 | -3.688014 | 4.352373  |
| N           | 2.043136  | 2.700199  | -4.417993 |
| H           | 2.284334  | 3.688147  | -4.352104 |
| H           | 2.282636  | 2.190853  | -5.26755  |

**Table S3.** Calculated bond lengths [ $\text{\AA}$ ] and angles [ $^\circ$ ] for the polymeric ionic  $\text{Fe}(\text{NH}_2\text{-trz})_3^{2+}$  complex, in the LS state, containing three Fe atoms and six  $\text{NH}_2\text{-trz}$  ligands at the B3LYP/LanL2DZ/6-31+G\* level of approximation

| No  | Parameter | B3LYP  | No        | Parameter           | B3LYP     |
|-----|-----------|--------|-----------|---------------------|-----------|
| r1  | r(1,4)    | 2.0991 | $\tau$ 16 | $\tau(18,1,11,15)$  | 135.3025  |
| r2  | r(1,11)   | 2.0992 | $\tau$ 17 | $\tau(26,1,11,12)$  | -135.2558 |
| r3  | r(1,18)   | 2.0993 | $\tau$ 18 | $\tau(26,1,11,15)$  | 44.7708   |
| r4  | r(1,26)   | 2.0991 | $\tau$ 19 | $\tau(40,1,11,12)$  | 135.2765  |
| r5  | r(1,33)   | 2.0992 | $\tau$ 20 | $\tau(40,1,11,15)$  | -44.697   |
| r6  | r(1,40)   | 2.0993 | $\tau$ 21 | $\tau(12,11,33,34)$ | -180.0003 |
| r7  | r(2,5)    | 1.9084 | $\tau$ 22 | $\tau(12,11,33,37)$ | -0.0087   |
| r8  | r(2,12)   | 1.9085 | $\tau$ 23 | $\tau(15,11,33,34)$ | 0.026     |
| r9  | r(2,19)   | 1.9085 | $\tau$ 24 | $\tau(15,11,33,37)$ | -179.9824 |
| r10 | r(3,6)    | 1.3763 | $\tau$ 25 | $\tau(4,1,18,19)$   | -44.763   |
| r11 | r(3,8)    | 1.3822 | $\tau$ 26 | $\tau(4,1,18,22)$   | 135.2396  |
| r12 | r(3,52)   | 1.3941 | $\tau$ 27 | $\tau(11,1,18,19)$  | 44.7579   |
| r13 | r(4,5)    | 1.4218 | $\tau$ 28 | $\tau(11,1,18,22)$  | -135.2395 |
| r14 | r(4,8)    | 1.3388 | $\tau$ 29 | $\tau(26,1,18,19)$  | 135.2376  |
| r15 | r(5,6)    | 1.3444 | $\tau$ 30 | $\tau(26,1,18,22)$  | -44.7598  |
| r16 | r(6,7)    | 1.0848 | $\tau$ 31 | $\tau(33,1,18,19)$  | -135.2416 |
| r17 | r(8,9)    | 1.0786 | $\tau$ 32 | $\tau(33,1,18,22)$  | 44.761    |
| r18 | r(10,13)  | 1.3763 | $\tau$ 33 | $\tau(19,18,40,41)$ | 179.9997  |
| r19 | r(10,15)  | 1.3822 | $\tau$ 34 | $\tau(19,18,40,44)$ | 0.0016    |
| r20 | r(10,55)  | 1.3941 | $\tau$ 35 | $\tau(22,18,40,41)$ | 0.003     |
| r21 | r(11,12)  | 1.4218 | $\tau$ 36 | $\tau(22,18,40,44)$ | -179.9951 |
| r22 | r(11,15)  | 1.3388 | $\tau$ 37 | $\tau(11,1,26,27)$  | -135.2929 |
| r23 | r(12,13)  | 1.3444 | $\tau$ 38 | $\tau(11,1,26,30)$  | 44.7294   |
| r24 | r(13,14)  | 1.0848 | $\tau$ 39 | $\tau(18,1,26,27)$  | 135.2006  |
| r25 | r(15,16)  | 1.0786 | $\tau$ 40 | $\tau(18,1,26,30)$  | -44.777   |
| r26 | r(17,20)  | 1.3763 | $\tau$ 41 | $\tau(33,1,26,27)$  | 44.7081   |
| r27 | r(17,22)  | 1.3822 | $\tau$ 42 | $\tau(33,1,26,30)$  | -135.2695 |
| r28 | r(17,58)  | 1.3941 | $\tau$ 43 | $\tau(40,1,26,27)$  | -44.8001  |
| r29 | r(18,19)  | 1.4219 | $\tau$ 44 | $\tau(40,1,26,30)$  | 135.2223  |

| No  | Parameter | B3LYP  | No        | Parameter          | B3LYP     |
|-----|-----------|--------|-----------|--------------------|-----------|
| r30 | r(18,22)  | 1.3388 | $\tau$ 45 | $\tau(4,1,33,34)$  | 135.254   |
| r31 | r(19,20)  | 1.3444 | $\tau$ 46 | $\tau(4,1,33,37)$  | -44.7541  |
| r32 | r(20,21)  | 1.0848 | $\tau$ 47 | $\tau(18,1,33,34)$ | -135.2764 |
| r33 | r(22,23)  | 1.0786 | $\tau$ 48 | $\tau(18,1,33,37)$ | 44.7154   |
| r34 | r(24,27)  | 1.9084 | $\tau$ 49 | $\tau(26,1,33,34)$ | -44.7447  |
| r35 | r(24,34)  | 1.9085 | $\tau$ 50 | $\tau(26,1,33,37)$ | 135.2471  |
| r36 | r(24,41)  | 1.9085 | $\tau$ 51 | $\tau(40,1,33,34)$ | 44.723    |
| r37 | r(25,28)  | 1.3763 | $\tau$ 52 | $\tau(40,1,33,37)$ | -135.2852 |
| r38 | r(25,30)  | 1.3822 | $\tau$ 53 | $\tau(4,1,40,41)$  | -135.2367 |
| r39 | r(25,46)  | 1.3941 | $\tau$ 54 | $\tau(4,1,40,44)$  | 44.7645   |
| r40 | r(26,27)  | 1.4218 | $\tau$ 55 | $\tau(11,1,40,41)$ | 135.2425  |
| r41 | r(26,30)  | 1.3388 | $\tau$ 56 | $\tau(11,1,40,44)$ | -44.7563  |
| r42 | r(27,28)  | 1.3444 | $\tau$ 57 | $\tau(26,1,40,41)$ | 44.7627   |
| r43 | r(28,29)  | 1.0848 | $\tau$ 58 | $\tau(26,1,40,44)$ | -135.2361 |
| r44 | r(30,31)  | 1.0786 | $\tau$ 59 | $\tau(33,1,40,41)$ | -44.7581  |
| r45 | r(32,35)  | 1.3763 | $\tau$ 60 | $\tau(33,1,40,44)$ | 135.2431  |
| r46 | r(32,37)  | 1.3822 | $\tau$ 61 | $\tau(12,2,5,4)$   | 49.381    |
| r47 | r(32,49)  | 1.3941 | $\tau$ 62 | $\tau(12,2,5,6)$   | -130.6474 |
| r48 | r(33,34)  | 1.4218 | $\tau$ 63 | $\tau(19,2,5,4)$   | -49.3712  |
| r49 | r(33,37)  | 1.3388 | $\tau$ 64 | $\tau(19,2,5,6)$   | 130.6004  |
| r50 | r(34,35)  | 1.3444 | $\tau$ 65 | $\tau(5,2,12,11)$  | -49.3461  |
| r51 | r(35,36)  | 1.0848 | $\tau$ 66 | $\tau(5,2,12,13)$  | 130.6153  |
| r52 | r(37,38)  | 1.0786 | $\tau$ 67 | $\tau(19,2,12,11)$ | 49.3914   |
| r53 | r(39,42)  | 1.3763 | $\tau$ 68 | $\tau(19,2,12,13)$ | -130.6473 |
| r54 | r(39,44)  | 1.3822 | $\tau$ 69 | $\tau(5,2,19,18)$  | 49.3978   |
| r55 | r(39,61)  | 1.3941 | $\tau$ 70 | $\tau(5,2,19,20)$  | -130.6273 |
| r56 | r(40,41)  | 1.4219 | $\tau$ 71 | $\tau(12,2,19,18)$ | -49.3541  |
| r57 | r(40,44)  | 1.3388 | $\tau$ 72 | $\tau(12,2,19,20)$ | 130.6208  |
| r58 | r(41,42)  | 1.3444 | $\tau$ 73 | $\tau(8,3,6,5)$    | -0.0043   |
| r59 | r(42,43)  | 1.0848 | $\tau$ 74 | $\tau(8,3,6,7)$    | 179.9939  |
| r60 | r(44,45)  | 1.0786 | $\tau$ 75 | $\tau(52,3,6,5)$   | -180.0057 |
| r61 | r(46,47)  | 1.0191 | $\tau$ 76 | $\tau(52,3,6,7)$   | -0.0074   |
| r62 | r(46,48)  | 1.0191 | $\tau$ 77 | $\tau(6,3,8,4)$    | -0.0034   |



| No  | Parameter  | B3LYP    | No   | Parameter      | B3LYP     |
|-----|------------|----------|------|----------------|-----------|
| r63 | r(49,50)   | 1.0191   | τ78  | τ(6,3,8,9)     | 179.9976  |
| r64 | r(49,51)   | 1.0191   | τ79  | τ(52,3,8,4)    | 179.9978  |
| r65 | r(52,53)   | 1.0191   | τ80  | τ(52,3,8,9)    | -0.0011   |
| r66 | r(52,54)   | 1.0191   | τ81  | τ(6,3,52,53)   | -74.5334  |
| r67 | r(55,56)   | 1.0191   | τ82  | τ(6,3,52,54)   | 74.4609   |
| r68 | r(55,57)   | 1.0191   | τ83  | τ(8,3,52,53)   | 105.4651  |
| r69 | r(58,59)   | 1.0191   | τ84  | τ(8,3,52,54)   | -105.5406 |
| r70 | r(58,60)   | 1.0191   | τ85  | τ(1,4,5,2)     | -0.0479   |
| r71 | r(61,62)   | 1.0191   | τ86  | τ(1,4,5,6)     | 179.9752  |
| r72 | r(61,63)   | 1.0191   | τ87  | τ(8,4,5,2)     | 179.965   |
| α1  | α(4,1,11)  | 89.5162  | τ88  | τ(8,4,5,6)     | -0.0119   |
| α2  | α(4,1,18)  | 89.4654  | τ89  | τ(1,4,8,3)     | -179.9766 |
| α3  | α(4,1,33)  | 90.4832  | τ90  | τ(1,4,8,9)     | 0.0223    |
| α4  | α(4,1,40)  | 90.5352  | τ91  | τ(5,4,8,3)     | 0.0093    |
| α5  | α(11,1,18) | 89.5019  | τ92  | τ(5,4,8,9)     | -179.9919 |
| α6  | α(11,1,26) | 90.4844  | τ93  | τ(2,5,6,3)     | -179.9644 |
| α7  | α(11,1,40) | 90.4974  | τ94  | τ(2,5,6,7)     | 0.0374    |
| α8  | α(18,1,26) | 90.5358  | τ95  | τ(4,5,6,3)     | 0.0101    |
| α9  | α(18,1,33) | 90.497   | τ96  | τ(4,5,6,7)     | -179.9881 |
| α10 | α(26,1,33) | 89.5162  | τ97  | τ(15,10,13,12) | 0.0059    |
| α11 | α(26,1,40) | 89.4636  | τ98  | τ(15,10,13,14) | 179.9983  |
| α12 | α(33,1,40) | 89.5037  | τ99  | τ(55,10,13,12) | 179.9727  |
| α13 | α(5,2,12)  | 97.5907  | τ100 | τ(55,10,13,14) | -0.0349   |
| α14 | α(5,2,19)  | 97.574   | τ101 | τ(13,10,15,11) | -0.0155   |
| α15 | α(12,2,19) | 97.591   | τ102 | τ(13,10,15,16) | 179.982   |
| α16 | α(6,3,8)   | 106.6612 | τ103 | τ(55,10,15,11) | -179.9847 |
| α17 | α(6,3,52)  | 129.5435 | τ104 | τ(55,10,15,16) | 0.0129    |
| α18 | α(8,3,52)  | 123.7953 | τ105 | τ(13,10,55,56) | -74.289   |
| α19 | α(1,4,5)   | 123.6699 | τ106 | τ(13,10,55,57) | 74.6972   |
| α20 | α(1,4,8)   | 130.7788 | τ107 | τ(15,10,55,56) | 105.6727  |
| α21 | α(5,4,8)   | 105.5512 | τ108 | τ(15,10,55,57) | -105.3411 |
| α22 | α(2,5,4)   | 121.6443 | τ109 | τ(1,11,12,2)   | -0.0249   |
| α23 | α(2,5,6)   | 129.6241 | τ110 | τ(1,11,12,13)  | 180.0065  |

| No            | Parameter          | B3LYP    | No           | Parameter           | B3LYP     |
|---------------|--------------------|----------|--------------|---------------------|-----------|
| $\alpha_{24}$ | $\alpha(4,5,6)$    | 108.7316 | $\tau_{111}$ | $\tau(15,11,12,2)$  | 179.9542  |
| $\alpha_{25}$ | $\alpha(3,6,5)$    | 108.4593 | $\tau_{112}$ | $\tau(15,11,12,13)$ | -0.0143   |
| $\alpha_{26}$ | $\alpha(3,6,7)$    | 124.0217 | $\tau_{113}$ | $\tau(1,11,15,10)$  | -180.0048 |
| $\alpha_{27}$ | $\alpha(5,6,7)$    | 127.519  | $\tau_{114}$ | $\tau(1,11,15,16)$  | -0.0021   |
| $\alpha_{28}$ | $\alpha(3,8,4)$    | 110.5967 | $\tau_{115}$ | $\tau(12,11,15,10)$ | 0.0182    |
| $\alpha_{29}$ | $\alpha(3,8,9)$    | 121.7687 | $\tau_{116}$ | $\tau(12,11,15,16)$ | -179.9792 |
| $\alpha_{30}$ | $\alpha(4,8,9)$    | 127.6346 | $\tau_{117}$ | $\tau(2,12,13,10)$  | -179.9602 |
| $\alpha_{31}$ | $\alpha(13,10,15)$ | 106.6632 | $\tau_{118}$ | $\tau(2,12,13,14)$  | 0.0478    |
| $\alpha_{32}$ | $\alpha(13,10,55)$ | 129.5427 | $\tau_{119}$ | $\tau(11,12,13,10)$ | 0.0051    |
| $\alpha_{33}$ | $\alpha(15,10,55)$ | 123.7941 | $\tau_{120}$ | $\tau(11,12,13,14)$ | -179.987  |
| $\alpha_{34}$ | $\alpha(1,11,12)$  | 123.6433 | $\tau_{121}$ | $\tau(22,17,20,19)$ | 0.0038    |
| $\alpha_{35}$ | $\alpha(1,11,15)$  | 130.8032 | $\tau_{122}$ | $\tau(22,17,20,21)$ | -179.987  |
| $\alpha_{36}$ | $\alpha(12,11,15)$ | 105.5535 | $\tau_{123}$ | $\tau(58,17,20,19)$ | 180.0054  |
| $\alpha_{37}$ | $\alpha(2,12,11)$  | 121.6696 | $\tau_{124}$ | $\tau(58,17,20,21)$ | 0.0146    |
| $\alpha_{38}$ | $\alpha(2,12,13)$  | 129.5983 | $\tau_{125}$ | $\tau(20,17,22,18)$ | -0.002    |
| $\alpha_{39}$ | $\alpha(11,12,13)$ | 108.7321 | $\tau_{126}$ | $\tau(20,17,22,23)$ | -180.0003 |
| $\alpha_{40}$ | $\alpha(10,13,12)$ | 108.4575 | $\tau_{127}$ | $\tau(58,17,22,18)$ | -180.0034 |
| $\alpha_{41}$ | $\alpha(10,13,14)$ | 124.0203 | $\tau_{128}$ | $\tau(58,17,22,23)$ | -0.0018   |
| $\alpha_{42}$ | $\alpha(12,13,14)$ | 127.5222 | $\tau_{129}$ | $\tau(20,17,58,59)$ | -74.5112  |
| $\alpha_{43}$ | $\alpha(10,15,11)$ | 110.5937 | $\tau_{130}$ | $\tau(20,17,58,60)$ | 74.4728   |
| $\alpha_{44}$ | $\alpha(10,15,16)$ | 121.7716 | $\tau_{131}$ | $\tau(22,17,58,59)$ | 105.4906  |
| $\alpha_{45}$ | $\alpha(11,15,16)$ | 127.6347 | $\tau_{132}$ | $\tau(22,17,58,60)$ | -105.5254 |
| $\alpha_{46}$ | $\alpha(20,17,22)$ | 106.6609 | $\tau_{133}$ | $\tau(1,18,19,2)$   | -0.0154   |
| $\alpha_{47}$ | $\alpha(20,17,58)$ | 129.5466 | $\tau_{134}$ | $\tau(1,18,19,20)$  | -179.995  |
| $\alpha_{48}$ | $\alpha(22,17,58)$ | 123.7924 | $\tau_{135}$ | $\tau(22,18,19,2)$  | 179.9825  |
| $\alpha_{49}$ | $\alpha(1,18,19)$  | 123.6838 | $\tau_{136}$ | $\tau(22,18,19,20)$ | 0.0029    |
| $\alpha_{50}$ | $\alpha(1,18,22)$  | 130.7641 | $\tau_{137}$ | $\tau(1,18,22,17)$  | 179.9972  |
| $\alpha_{51}$ | $\alpha(19,18,22)$ | 105.5522 | $\tau_{138}$ | $\tau(1,18,22,23)$  | -0.0045   |
| $\alpha_{52}$ | $\alpha(2,19,18)$  | 121.6228 | $\tau_{139}$ | $\tau(19,18,22,17)$ | -0.0005   |
| $\alpha_{53}$ | $\alpha(2,19,20)$  | 129.6475 | $\tau_{140}$ | $\tau(19,18,22,23)$ | 179.9977  |
| $\alpha_{54}$ | $\alpha(18,19,20)$ | 108.7297 | $\tau_{141}$ | $\tau(2,19,20,17)$  | -179.9816 |
| $\alpha_{55}$ | $\alpha(17,20,19)$ | 108.4605 | $\tau_{142}$ | $\tau(2,19,20,21)$  | 0.0087    |
| $\alpha_{56}$ | $\alpha(17,20,21)$ | 124.0244 | $\tau_{143}$ | $\tau(18,19,20,17)$ | -0.0042   |

| No          | Parameter          | B3LYP    | No         | Parameter           | B3LYP     |
|-------------|--------------------|----------|------------|---------------------|-----------|
| $\alpha 57$ | $\alpha(19,20,21)$ | 127.5151 | $\tau 144$ | $\tau(18,19,20,21)$ | 179.9862  |
| $\alpha 58$ | $\alpha(17,22,18)$ | 110.5967 | $\tau 145$ | $\tau(34,24,27,26)$ | -49.3872  |
| $\alpha 59$ | $\alpha(17,22,23)$ | 121.7741 | $\tau 146$ | $\tau(34,24,27,28)$ | 130.6543  |
| $\alpha 60$ | $\alpha(18,22,23)$ | 127.6292 | $\tau 147$ | $\tau(41,24,27,26)$ | 49.3706   |
| $\alpha 61$ | $\alpha(27,24,34)$ | 97.5898  | $\tau 148$ | $\tau(41,24,27,28)$ | -130.5879 |
| $\alpha 62$ | $\alpha(27,24,41)$ | 97.5738  | $\tau 149$ | $\tau(27,24,34,33)$ | 49.349    |
| $\alpha 63$ | $\alpha(34,24,41)$ | 97.5967  | $\tau 150$ | $\tau(27,24,34,35)$ | -130.6228 |
| $\alpha 64$ | $\alpha(28,25,30)$ | 106.6612 | $\tau 151$ | $\tau(41,24,34,33)$ | -49.389   |
| $\alpha 65$ | $\alpha(28,25,46)$ | 129.5437 | $\tau 152$ | $\tau(41,24,34,35)$ | 130.6392  |
| $\alpha 66$ | $\alpha(30,25,46)$ | 123.7951 | $\tau 153$ | $\tau(27,24,41,40)$ | -49.4025  |
| $\alpha 67$ | $\alpha(1,26,27)$  | 123.6702 | $\tau 154$ | $\tau(27,24,41,42)$ | 130.6285  |
| $\alpha 68$ | $\alpha(1,26,30)$  | 130.779  | $\tau 155$ | $\tau(34,24,41,40)$ | 49.3494   |
| $\alpha 69$ | $\alpha(27,26,30)$ | 105.5508 | $\tau 156$ | $\tau(34,24,41,42)$ | -130.6196 |
| $\alpha 70$ | $\alpha(24,27,26)$ | 121.6434 | $\tau 157$ | $\tau(30,25,28,27)$ | 0.0075    |
| $\alpha 71$ | $\alpha(24,27,28)$ | 129.6253 | $\tau 158$ | $\tau(30,25,28,29)$ | -179.9889 |
| $\alpha 72$ | $\alpha(26,27,28)$ | 108.7313 | $\tau 159$ | $\tau(46,25,28,27)$ | -179.9832 |
| $\alpha 73$ | $\alpha(25,28,27)$ | 108.4596 | $\tau 160$ | $\tau(46,25,28,29)$ | 0.0204    |
| $\alpha 74$ | $\alpha(25,28,29)$ | 124.022  | $\tau 161$ | $\tau(28,25,30,26)$ | -0.0056   |
| $\alpha 75$ | $\alpha(27,28,29)$ | 127.5184 | $\tau 162$ | $\tau(28,25,30,31)$ | -179.9972 |
| $\alpha 76$ | $\alpha(25,30,26)$ | 110.5971 | $\tau 163$ | $\tau(46,25,30,26)$ | 179.9857  |
| $\alpha 77$ | $\alpha(25,30,31)$ | 121.7691 | $\tau 164$ | $\tau(46,25,30,31)$ | -0.0058   |
| $\alpha 78$ | $\alpha(26,30,31)$ | 127.6338 | $\tau 165$ | $\tau(28,25,46,47)$ | -74.5343  |
| $\alpha 79$ | $\alpha(35,32,37)$ | 106.6632 | $\tau 166$ | $\tau(28,25,46,48)$ | 74.4578   |
| $\alpha 80$ | $\alpha(35,32,49)$ | 129.5419 | $\tau 167$ | $\tau(30,25,46,47)$ | 105.4764  |
| $\alpha 81$ | $\alpha(37,32,49)$ | 123.7949 | $\tau 168$ | $\tau(30,25,46,48)$ | -105.5315 |
| $\alpha 82$ | $\alpha(1,33,34)$  | 123.6448 | $\tau 169$ | $\tau(1,26,27,24)$  | 0.0544    |
| $\alpha 83$ | $\alpha(1,33,37)$  | 130.8022 | $\tau 170$ | $\tau(1,26,27,28)$  | -179.9793 |
| $\alpha 84$ | $\alpha(34,33,37)$ | 105.553  | $\tau 171$ | $\tau(30,26,27,24)$ | -179.9632 |
| $\alpha 85$ | $\alpha(24,34,33)$ | 121.6674 | $\tau 172$ | $\tau(30,26,27,28)$ | 0.0031    |
| $\alpha 86$ | $\alpha(24,34,35)$ | 129.6011 | $\tau 173$ | $\tau(1,26,30,25)$  | 179.9823  |
| $\alpha 87$ | $\alpha(33,34,35)$ | 108.7314 | $\tau 174$ | $\tau(1,26,30,31)$  | -0.0268   |
| $\alpha 88$ | $\alpha(32,35,34)$ | 108.4581 | $\tau 175$ | $\tau(27,26,30,25)$ | 0.0016    |
| $\alpha 89$ | $\alpha(32,35,36)$ | 124.0202 | $\tau 176$ | $\tau(27,26,30,31)$ | 179.9926  |

| No           | Parameter          | B3LYP    | No         | Parameter           | B3LYP     |
|--------------|--------------------|----------|------------|---------------------|-----------|
| $\alpha$ 90  | $\alpha(34,35,36)$ | 127.5217 | $\tau$ 177 | $\tau(24,27,28,25)$ | 179.9561  |
| $\alpha$ 91  | $\alpha(32,37,33)$ | 110.5942 | $\tau$ 178 | $\tau(24,27,28,29)$ | -0.0477   |
| $\alpha$ 92  | $\alpha(32,37,38)$ | 121.7712 | $\tau$ 179 | $\tau(26,27,28,25)$ | -0.0066   |
| $\alpha$ 93  | $\alpha(33,37,38)$ | 127.6346 | $\tau$ 180 | $\tau(26,27,28,29)$ | 179.9896  |
| $\alpha$ 94  | $\alpha(42,39,44)$ | 106.661  | $\tau$ 181 | $\tau(37,32,35,34)$ | -0.0095   |
| $\alpha$ 95  | $\alpha(42,39,61)$ | 129.5462 | $\tau$ 182 | $\tau(37,32,35,36)$ | 179.9961  |
| $\alpha$ 96  | $\alpha(44,39,61)$ | 123.7928 | $\tau$ 183 | $\tau(49,32,35,34)$ | -179.994  |
| $\alpha$ 97  | $\alpha(1,40,41)$  | 123.6836 | $\tau$ 184 | $\tau(49,32,35,36)$ | 0.0116    |
| $\alpha$ 98  | $\alpha(1,40,44)$  | 130.7647 | $\tau$ 185 | $\tau(35,32,37,33)$ | 0.0144    |
| $\alpha$ 99  | $\alpha(41,40,44)$ | 105.5518 | $\tau$ 186 | $\tau(35,32,37,38)$ | -179.9845 |
| $\alpha$ 100 | $\alpha(24,41,40)$ | 121.621  | $\tau$ 187 | $\tau(49,32,37,33)$ | -180      |
| $\alpha$ 101 | $\alpha(24,41,42)$ | 129.6503 | $\tau$ 188 | $\tau(49,32,37,38)$ | 0.001     |
| $\alpha$ 102 | $\alpha(40,41,42)$ | 108.7287 | $\tau$ 189 | $\tau(35,32,49,50)$ | -74.566   |
| $\alpha$ 103 | $\alpha(39,42,41)$ | 108.4614 | $\tau$ 190 | $\tau(35,32,49,51)$ | 74.4212   |
| $\alpha$ 104 | $\alpha(39,42,43)$ | 124.024  | $\tau$ 191 | $\tau(37,32,49,50)$ | 105.4519  |
| $\alpha$ 105 | $\alpha(41,42,43)$ | 127.5146 | $\tau$ 192 | $\tau(37,32,49,51)$ | -105.561  |
| $\alpha$ 106 | $\alpha(39,44,40)$ | 110.5972 | $\tau$ 193 | $\tau(1,33,34,24)$  | 0.0236    |
| $\alpha$ 107 | $\alpha(39,44,45)$ | 121.7736 | $\tau$ 194 | $\tau(1,33,34,35)$  | -179.9993 |
| $\alpha$ 108 | $\alpha(40,44,45)$ | 127.6292 | $\tau$ 195 | $\tau(37,33,34,24)$ | -179.97   |
| $\alpha$ 109 | $\alpha(25,46,47)$ | 116.6729 | $\tau$ 196 | $\tau(37,33,34,35)$ | 0.0071    |
| $\alpha$ 110 | $\alpha(25,46,48)$ | 116.6785 | $\tau$ 197 | $\tau(1,33,37,32)$  | 179.9939  |
| $\alpha$ 111 | $\alpha(47,46,48)$ | 118.8686 | $\tau$ 198 | $\tau(1,33,37,38)$  | -0.0072   |
| $\alpha$ 112 | $\alpha(32,49,50)$ | 116.6764 | $\tau$ 199 | $\tau(34,33,37,32)$ | -0.0132   |
| $\alpha$ 113 | $\alpha(32,49,51)$ | 116.6746 | $\tau$ 200 | $\tau(34,33,37,38)$ | 179.9857  |
| $\alpha$ 114 | $\alpha(50,49,51)$ | 118.8667 | $\tau$ 201 | $\tau(24,34,35,32)$ | 179.9763  |
| $\alpha$ 115 | $\alpha(3,52,53)$  | 116.6789 | $\tau$ 202 | $\tau(24,34,35,36)$ | -0.0296   |
| $\alpha$ 116 | $\alpha(3,52,54)$  | 116.6733 | $\tau$ 203 | $\tau(33,34,35,32)$ | 0.0016    |
| $\alpha$ 117 | $\alpha(53,52,54)$ | 118.869  | $\tau$ 204 | $\tau(33,34,35,36)$ | 179.9958  |
| $\alpha$ 118 | $\alpha(10,55,56)$ | 116.6743 | $\tau$ 205 | $\tau(44,39,42,41)$ | -0.0045   |
| $\alpha$ 119 | $\alpha(10,55,57)$ | 116.6769 | $\tau$ 206 | $\tau(44,39,42,43)$ | 179.9903  |
| $\alpha$ 120 | $\alpha(56,55,57)$ | 118.8661 | $\tau$ 207 | $\tau(61,39,42,41)$ | 179.9894  |
| $\alpha$ 121 | $\alpha(17,58,59)$ | 116.6723 | $\tau$ 208 | $\tau(61,39,42,43)$ | -0.0158   |
| $\alpha$ 122 | $\alpha(17,58,60)$ | 116.6756 | $\tau$ 209 | $\tau(42,39,44,40)$ | 0.0005    |

| No           | Parameter          | B3LYP     | No         | Parameter           | B3LYP     |
|--------------|--------------------|-----------|------------|---------------------|-----------|
| $\alpha$ 123 | $\alpha(59,58,60)$ | 118.8679  | $\tau$ 210 | $\tau(42,39,44,45)$ | 179.996   |
| $\alpha$ 124 | $\alpha(39,61,62)$ | 116.6758  | $\tau$ 211 | $\tau(61,39,44,40)$ | 180.0061  |
| $\alpha$ 125 | $\alpha(39,61,63)$ | 116.6727  | $\tau$ 212 | $\tau(61,39,44,45)$ | 0.0016    |
| $\alpha$ 126 | $\alpha(62,61,63)$ | 118.8687  | $\tau$ 213 | $\tau(42,39,61,62)$ | -74.4552  |
| $\tau$ 1     | $\tau(11,1,4,5)$   | -44.7121  | $\tau$ 214 | $\tau(42,39,61,63)$ | 74.5317   |
| $\tau$ 2     | $\tau(11,1,4,8)$   | 135.2715  | $\tau$ 215 | $\tau(44,39,61,62)$ | 105.5378  |
| $\tau$ 3     | $\tau(18,1,4,5)$   | 44.7943   | $\tau$ 216 | $\tau(44,39,61,63)$ | -105.4753 |
| $\tau$ 4     | $\tau(18,1,4,8)$   | -135.2221 | $\tau$ 217 | $\tau(1,40,41,24)$  | 0.0199    |
| $\tau$ 5     | $\tau(33,1,4,5)$   | 135.2868  | $\tau$ 218 | $\tau(1,40,41,42)$  | 179.9946  |
| $\tau$ 6     | $\tau(33,1,4,8)$   | -44.7296  | $\tau$ 219 | $\tau(44,40,41,24)$ | -179.9811 |
| $\tau$ 7     | $\tau(40,1,4,5)$   | -135.205  | $\tau$ 220 | $\tau(44,40,41,42)$ | -0.0063   |
| $\tau$ 8     | $\tau(40,1,4,8)$   | 44.7786   | $\tau$ 221 | $\tau(1,40,44,39)$  | -179.9976 |
| $\tau$ 9     | $\tau(5,4,26,27)$  | 179.9952  | $\tau$ 222 | $\tau(1,40,44,45)$  | 0.0072    |
| $\tau$ 10    | $\tau(5,4,26,30)$  | 0.0172    | $\tau$ 223 | $\tau(41,40,44,39)$ | 0.0035    |
| $\tau$ 11    | $\tau(8,4,26,27)$  | -0.0215   | $\tau$ 224 | $\tau(41,40,44,45)$ | -179.9917 |
| $\tau$ 12    | $\tau(8,4,26,30)$  | 180.0005  | $\tau$ 225 | $\tau(24,41,42,39)$ | 179.9788  |
| $\tau$ 13    | $\tau(4,1,11,12)$  | 44.7455   | $\tau$ 226 | $\tau(24,41,42,43)$ | -0.0157   |
| $\tau$ 14    | $\tau(4,1,11,15)$  | -135.228  | $\tau$ 227 | $\tau(40,41,42,39)$ | 0.0067    |
| $\tau$ 15    | $\tau(18,1,11,12)$ | -44.7241  | $\tau$ 228 | $\tau(40,41,42,43)$ | -179.9878 |

r: Distances;  $\alpha$ : Angle;  $\tau$ :Dihedral angle
